# Supplementary material for: Novel Cinnamaldehyde Derivatives Inhibit Peripheral Nerve Degeneration by Targeting Schwann Cells
Source: MDPI journal article supplement (doi:10.3390/antiox11101846), 2022-09-20
Supplement: s1 [file s1]

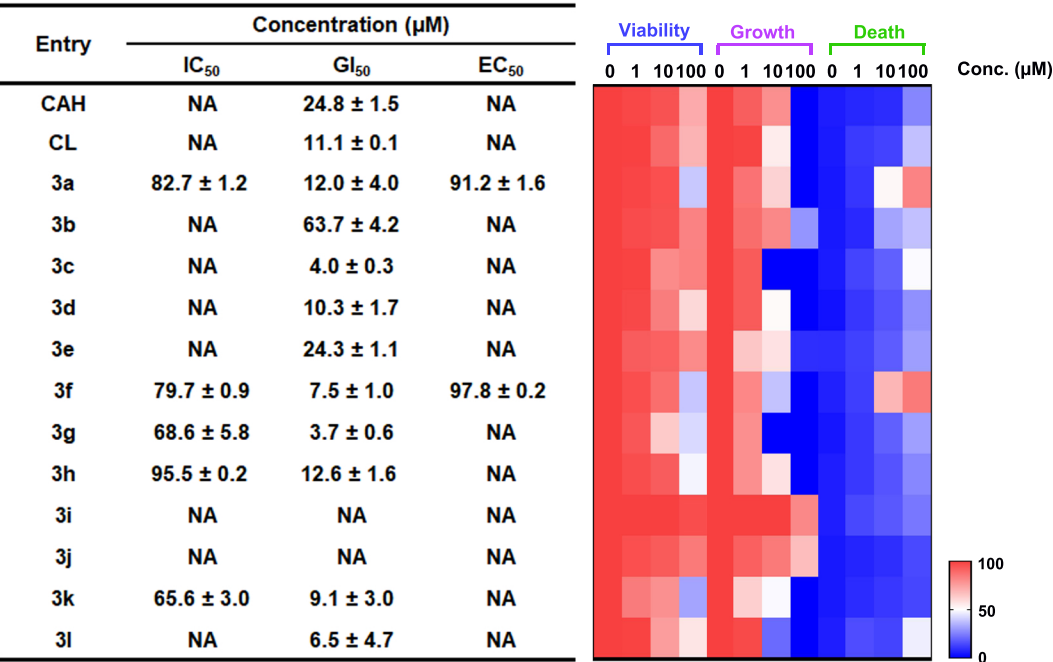

\* NA: not available

**Figure S1.** Therapeutic indices of CAH derivatives in dedifferentiated SW10 cells. The table (left panel) designated the corresponding concentration of half maximal inhibitory concentration (IC<sub>50</sub>), half-maximal growth inhibition (GI<sub>50</sub>), and half maximal effective concentration (EC<sub>50</sub>) in the SW10 cells with **3a-3l** treatment. The heatmap (right panel) represented the concentration-dependent change of cell viability (%), growth inhibition (%), and cell death (%) of SW10 cells treated with **3a-3l**.

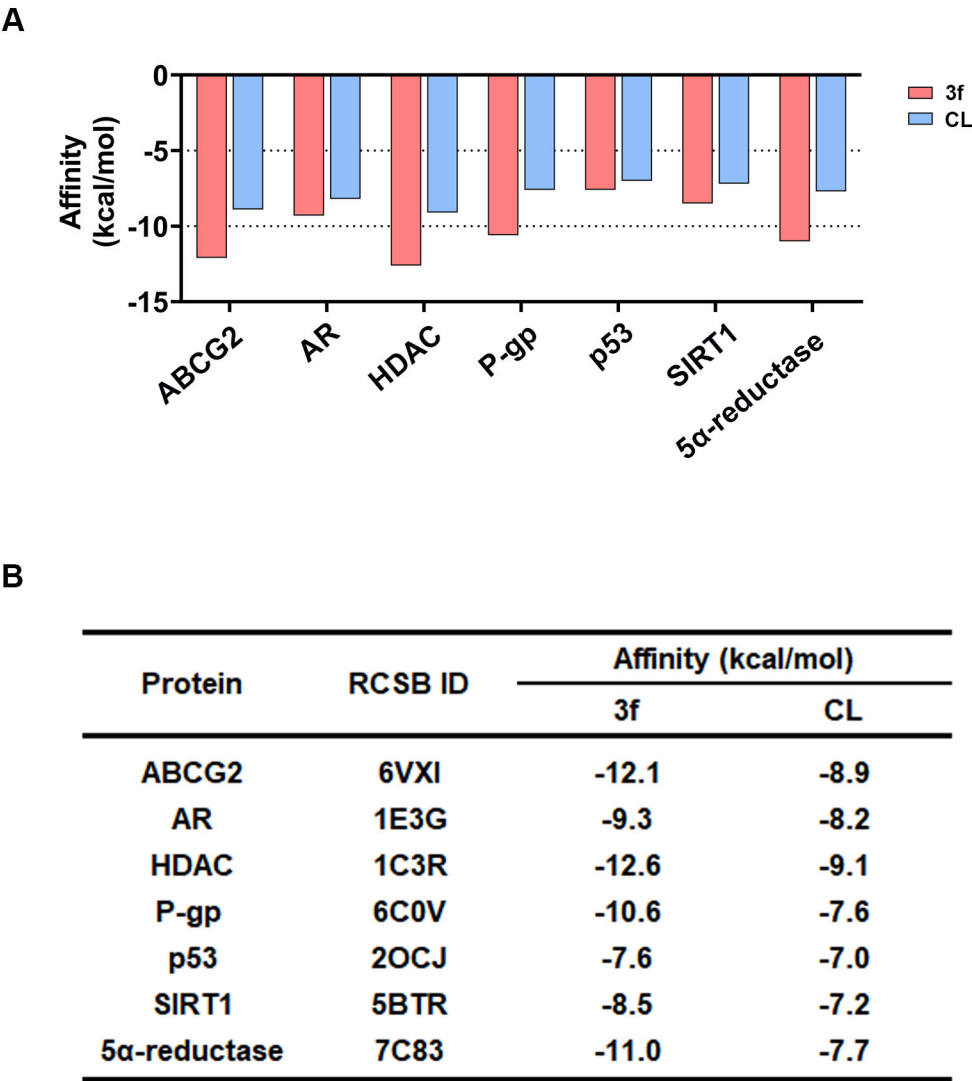

**Figure S2.** Bindig affinity between protein targets of chalcone (CL) and **3f**. (A) Binding free energy of **3f** and CL with each target was shown as red and blue bars, respectively. (B) Binding potency was compared between **3f** and CL. AR, adrogen receptor; P-gp, P-glycoprotein.

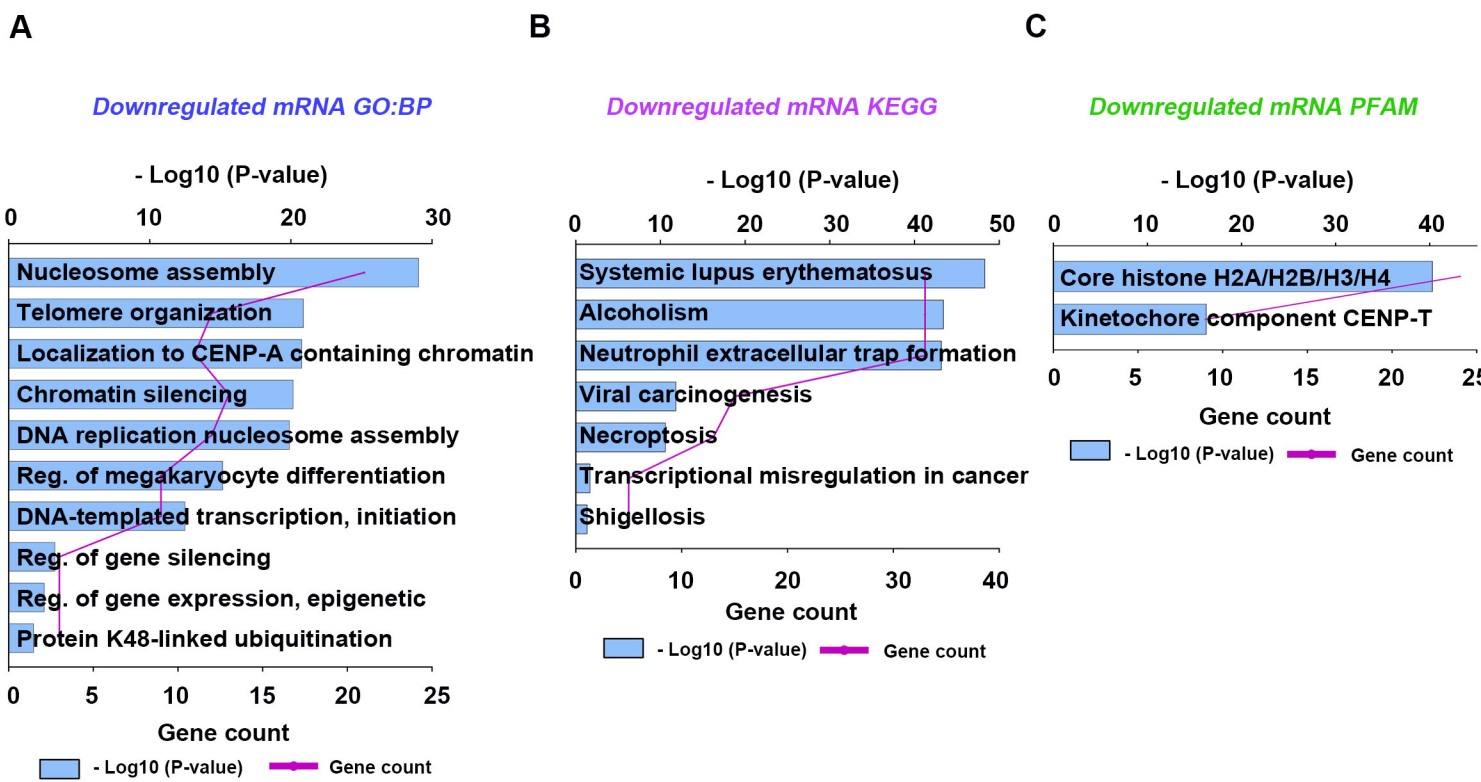

A

Upregulated mRNA

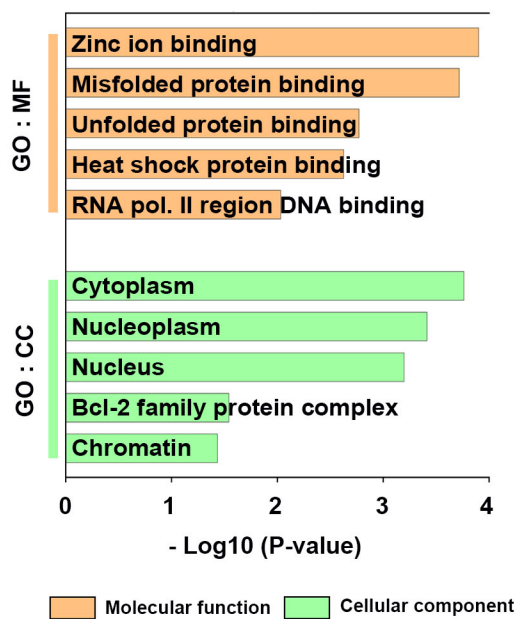

B

Downregulated mRNA

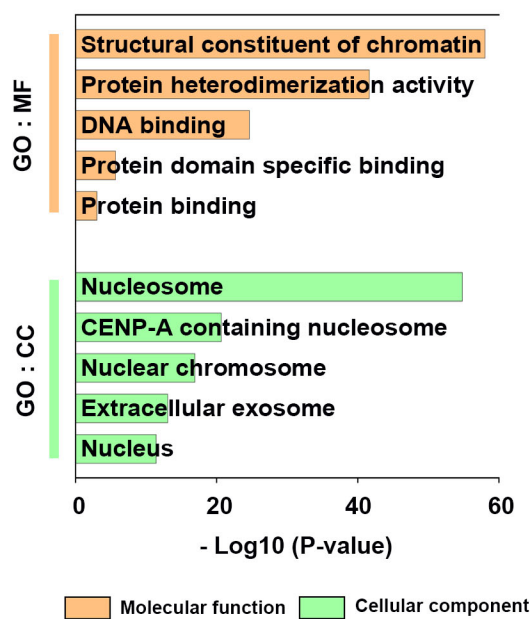

**Figure S4.** GO molecular function (MF) and cellular component (CC) analysis using upregulated and downregulated DEGs. The GO categories contained the top 5 terms of GO:MF or GO:CC were indicated in (A) and (B), respectively. Top 5 enrichment scores were obtained from the DAVID database.



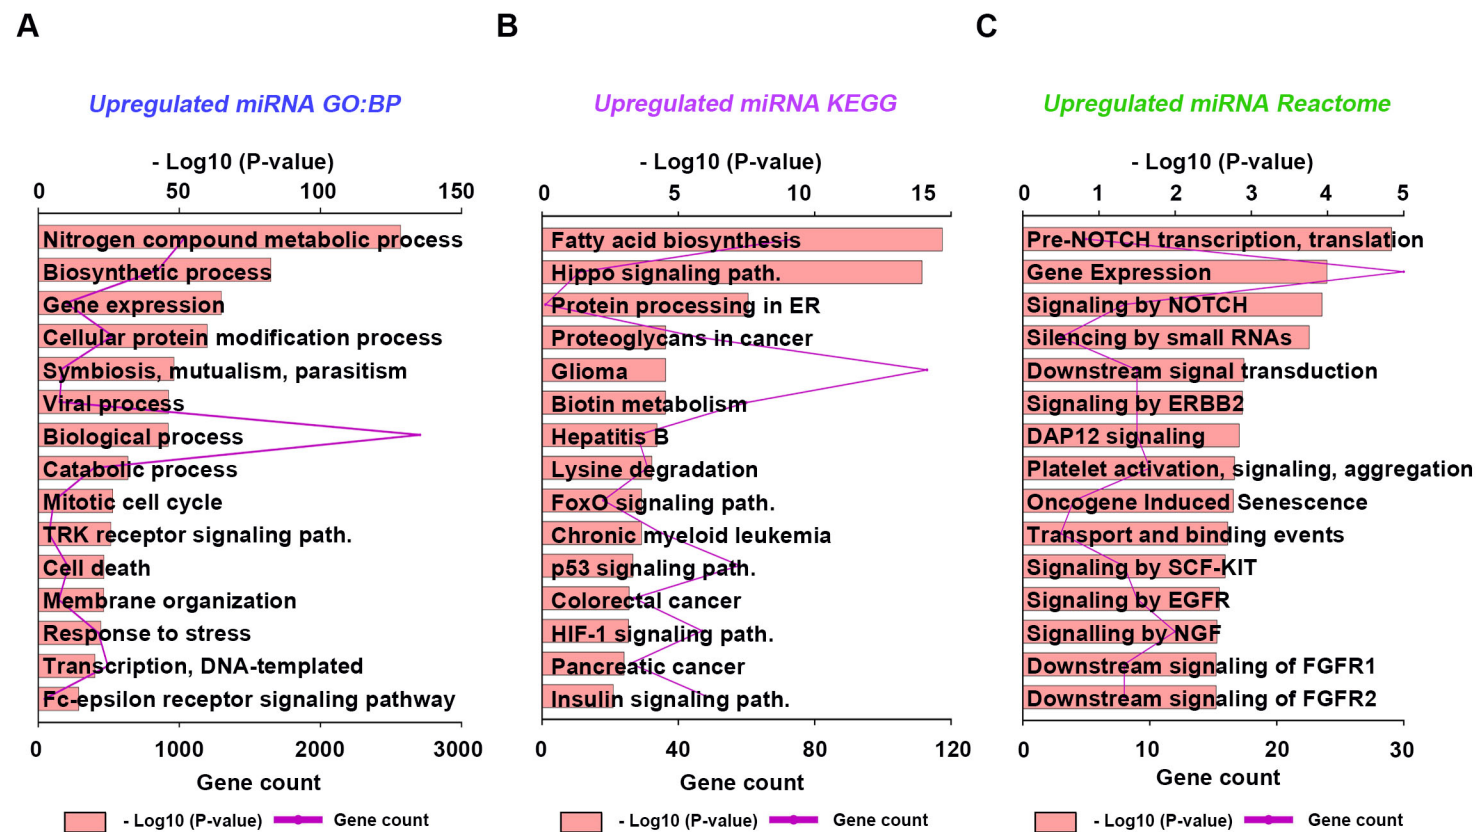

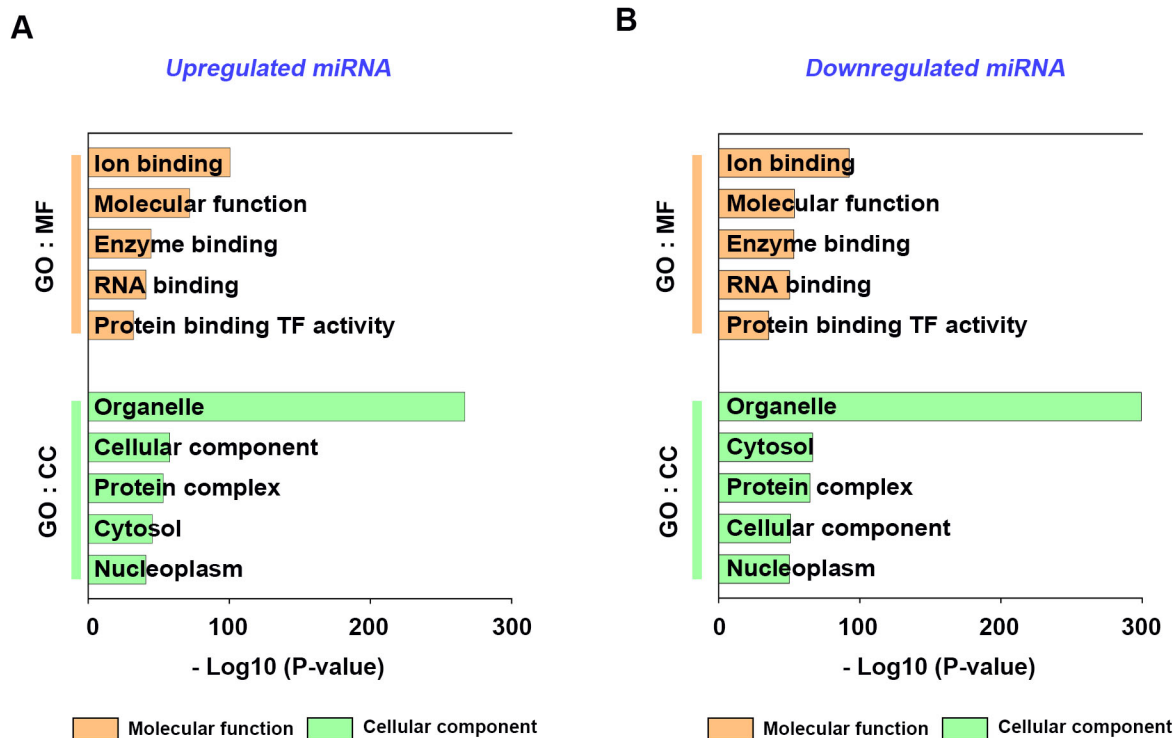

**Figure S6.** GO molecular function (MF) and cellular component (CC) analysis using upregulated and downregulated DE miRNAs. The GO categories contained the top 5 terms of GO:MF or GO:CC were indicated in (A) and (B), respectively. Top 5 enrichment scores were obtained from the DAVID database.

Table S1. Primer sequences used in qPCR validation

| Gene            | Forward (5'-3')           | Reverse (5'-3')                                   | bp  |
|-----------------|---------------------------|---------------------------------------------------|-----|
| <i>TSPYL2</i>   | GCAAGTTCATCCAGATGCGA      | GTGGTTGAGGAATGCTTTGAC                             | 95  |
| <i>GDF9</i>     | GAGTGTGAGCTCCATGACTTT     | CCC TTTACAGTATCGAGGGTTG                           | 99  |
| <i>SESN2</i>    | CAGCCTATAGCCTCACCTAC      | TATCTGATGCCAAAGACGCA                              | 109 |
| <i>CRYAB</i>    | GTCAACC TGGATGTGAAGCAC TT | TTCATCCTGGCGCTC TTCAT                             | 102 |
| <i>HSPA1B</i>   | CCATTGAGGAGGTGGATTAGGG    | ATGACATAGGAAAACAGCAGCA                            | 100 |
| <i>NR4A2</i>    | GGGATGGTCAAAGAAGTGGTTCG   | GGTCATAGCCGGGTGGAGTC                              | 162 |
| <i>DHRS2</i>    | GCCCTACATGGAGAACAGGA      | AGC TCCAATGCCAGTG TTCT                            | 138 |
| <i>GAPDH</i>    | GGAAGGTGAAGGTCGGAGTCA     | GTCATTGATGGCAACAAATATCCACT                        | 101 |
| hsa-miR-1246    | AATGGATTTTTGGAGCAGG       |                                                   |     |
| hsa-miR-147b-3p | GTGTGCGGAAATGC TTCTGCT    |                                                   |     |
| hsa-miR-1303    | TTTAGAGACGGGGTCTTGCTCT    |                                                   |     |
| hsa-miR-320d    | AAAAGCTGGGTTGAGAGGA       |                                                   |     |
| hsa-miR-193a-3p | AACTGGCC TACAAAG TCCCAGT  | QuantMir Universal Primer<br>(System Biosciences) |     |
| hsa-miR-23a-3p  | ATCACATTGCCAGGGATTCC      |                                                   |     |
| hsa-miR-16-2-3p | CCAATATTACTGTGCTGCTTTA    |                                                   |     |
| hsa-miR-7-5p    | TGGAAGACTAGTGATTTTGTGTT   |                                                   |     |
| hsa-miR-425-5p  | AATGACACGATCACTCCCGTTGA   |                                                   |     |
| hsa-miR-155-5p  | TTAATGCTAATCGTGATAGGGGTT  |                                                   |     |
| human U6        | CGCAAGGATGACACGCAAA TTC   |                                                   |     |

Table S2. Molecular docking between TRPA1 and CAH derivatives

| Protein (RCSB ID): TRPA1 (6X2J) |                        |        |                        |
|---------------------------------|------------------------|--------|------------------------|
| Ligand                          | Affinity<br>(kcal/mol) | Ligand | Affinity<br>(kcal/mol) |
| 3a                              | -7.4                   | 3g     | -8.4                   |
| 3b                              | -7.2                   | 3h     | -7.5                   |
| 3c                              | -8.8                   | 3i     | -7.2                   |
| 3d                              | -7.4                   | 3j     | -7.3                   |
| 3e                              | -9                     | 3k     | -6.6                   |
| 3f                              | -9.6                   | 3l     | -7.3                   |
